# Supplementary material for: Regulation of Inflammation-Related Genes through Fosl1 Suppression in a Levetiracetam-Treated Pilocarpine-Induced Status Epilepticus Mouse Model
Source: MDPI journal article supplement (doi:10.3390/ijms23147608), 2022-07-09
Supplement: s1 [file s1]

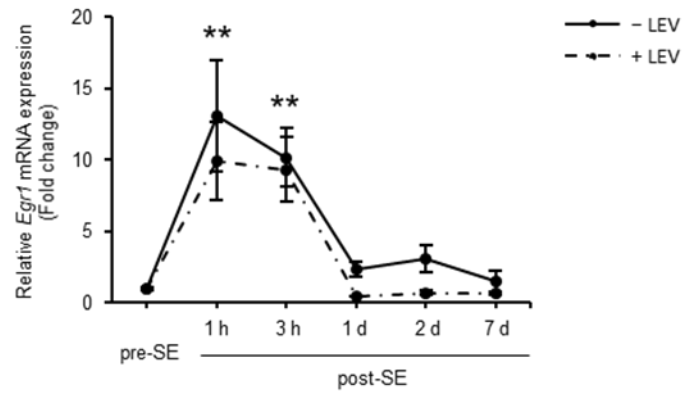

**Figure S1.** Real-time PCR analysis of *Egr1* mRNA expression in the hippocampus after SE in mice treated with LEV or untreated. Total RNA was extracted from the hippocampi of mice treated with PILO at 1 h, 3 h, 1 day, 2 days and 7 days post-SE and pre-SE in mice treated with LEV or mice that were untreated. The values were normalized relative to the  $\beta$ -actin (*Actb*) mRNA level and then divided by that of the control group (pre-SE) to calculate the relative mRNA levels. All data points represent the mean  $\pm$  SEM of three independent experiments ( $n = 3-9$ ). Data were analyzed for significant differences by one-way ANOVA and Tukey's post-hoc test. Results with  $p$  values  $< 0.05$  were considered statistically significant. \*\*  $p < 0.01$  vs. pre-SE mice.
